# Supplementary material for: A photothermal cell viability-reporting theranostic nanoprobe for intraoperative optical ablation and tracking of tumors
Source: Royal Society of Chemistry journal article supplement (doi:10.1039/c4cc01823k), 2014-01-01
Supplement: c4cc01823k1.pdf [file c4cc01823k1.pdf]

Cite this: DOI: 10.1039/c0xx00000x

www.rsc.org/xxxxxx

ARTICLE TYPE

Electronic Supplementary Information (ESI)

## A cell viability-reporting photothermal theragnostic nanoprobe for intraoperative optical ablation and tracking of tumors

Shuqi Wu,<sup>a</sup> Shoufa Han<sup>a,\*</sup> and Xinhui Su<sup>b,\*</sup>

<sup>a</sup>Department of Chemical Biology, College of Chemistry and Chemical Engineering, the Key Laboratory for Chemical Biology of Fujian Province, The MOE Key Laboratory of Spectrochemical Analysis & Instrumentation, and Innovation Center for Cell Biology, Xiamen University;

<sup>b</sup>Department of Nuclear Medicine & Minnan PET Center, The First Affiliated Hospital of Xiamen University, Xiamen, 361005 China  
Tel: 86-0592-2181728; E-mail: [shoufa@xmu.edu.cn](mailto:shoufa@xmu.edu.cn); [suxinhui@163.com](mailto:suxinhui@163.com)

10

### Experimental

#### Material and methods

LysoTracker Green DND-26 was purchased from Invitrogen. Bafilomycin A, and methoxypolyethylene glycol 5,000 acetic acid were purchased from Simga. DAPI (4',6-diamino-2-phenylindole) was obtained from Bioluminor. PPy nanoparticles were synthesized following a reported method.<sup>[1]</sup> dRB-EDA was prepared as previously described.<sup>[2]</sup> Unless specified, all other reagents were obtained from Alfa Aesar. Fluorescence emission spectra and UV-vis absorption spectra were recorded on a spectrofluorometer (SpectraMax M5, Molecular Device). Dynamic light scattering and surface potential analysis of the nanoparticles were performed on Zetasizer Nano ZS (ZEN3500, Malvern), NIR irradiation was carried out by using an optical fiber coupled 808 nm high power laser diode (BWT Beijing Co., Ltd.). HepG2, 4T1 and HeLa cells were obtained from the American Type Culture Collection (ATCC). Confocal fluorescence microscopy images were obtained on Leica SP5 using the following filters:  $\lambda_{ex}$ @488 nm and  $\lambda_{em}$ @500-530 nm for LysoTracker Green DND-26 signal, and  $\lambda_{ex}$ @543 nm and  $\lambda_{em}$ @580-620 nm for the rhodamine signal. The fluorescence signals of LysoTracker green and rhodamine inside cells were merged using Photoshop CS 5.0.

#### Preparation of PPy@SiO<sub>2</sub>@dRB

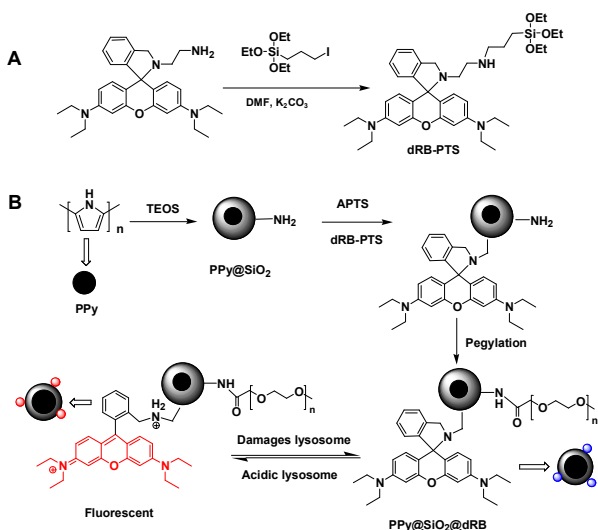

35 **Scheme 1.** Synthesis of PPy@SiO<sub>2</sub>@dRB

**Synthesis of dRB-PTS:** dRB-ethylenediamine (50 mg) was incubated with 3-iodopropyltriethoxysilane (50  $\mu$ l) in DMF (500  $\mu$ l) containing K<sub>2</sub>CO<sub>3</sub> (100 mg). The mixture was incubated with gentle stirring at rt for 30 min and then directly used for coating of the silica nanoparticles.

**PPy@SiO<sub>2</sub>:** PPy nanoparticles (90 mg) were dispersed in an aqueous solution containing ethanol (210 ml), ultrapure water (30 ml) and 25% ammonia solution (9.4 ml). The mixture was sonicated for 10 min followed by dropwise addition of TEOS (1.6 ml) in ethanol (12 ml). The solution was stirred vigorously at rt for 8 h. The resultant particles were collected by centrifuging at 15000 rpm for 20min, washed with ethanol and then re-dispersed in ultrapure water (360 ml) containing CTAB (1 g). After ultrasonication for 30 min, tetraethoxysilane (TEOS) (480  $\mu$ l) was added dropwisely into the solution which was stirred vigorously at 45 °C for 24 h. The resultant particles were harvested by centrifugation, washed with ethanol and then dispersed in of ethanol (100 ml) containing NH<sub>4</sub>NO<sub>3</sub> (2 g). The mixture was stirred at 45 °C for 24 h to remove CTAB, and then centrifuged to give PPy@SiO<sub>2</sub> which was washed with methanol before use.

**PPy@SiO<sub>2</sub>@dRB:** PPy@SiO<sub>2</sub> (500 mg) was dispersed in toluene (50 ml) containing of the aforementioned dRB-PTS solution and APTS (100  $\mu$ l). The mixture was kept for 20 h at 80°C. The resultant particles were collected by centrifugation, and then washed with ethanol-acetic acid solution. The formentioned particles (500 mg) were added to anhydrous DMF (20 mL) containing NHS ester of polyethylene glycol (MW 5000, 0.145g) and triethylamine (200  $\mu$ l). The mixture was sonicated for 90 min followed by addition of saturated NaHCO<sub>3</sub> solution (30 mL). The mixture was further sonicated for 90 min, and then centrifuged. The nanoparticles were collected, extensively washed with deionized water to remove residual reagents, and then stored in water (0.1mg ml<sup>-1</sup>) for subsequent characterization.

**SiO<sub>2</sub>@dRB:** TEOS (2.3 ml) was added into a clean flask containing deionized water (240 ml), cetyltrimethylammonium bromide (0.5 g) and aqueous sodium hydroxide solution (2 M, 1.8 ml) at 80 °C. the mixtyre was stirred vigorously for 1 h and then the product was collected by centrifugation. The resultant nanoparticles was then coated with dRB-PTS and APTS and then pegylated following the aforementioned precedure to give SiO<sub>2</sub>@dRB,

#### Dynamic size and zeta potential measurements

80 PPy@SiO<sub>2</sub>@dRB, PPy@SiO<sub>2</sub>, and PPy were dispersed in distilled water (100  $\mu$ g ml<sup>-1</sup>), sonicated and then analyzed with a

Zetasizer Nano ZS (ZEN3500) to determine their statistical size distributions and zeta potentials.

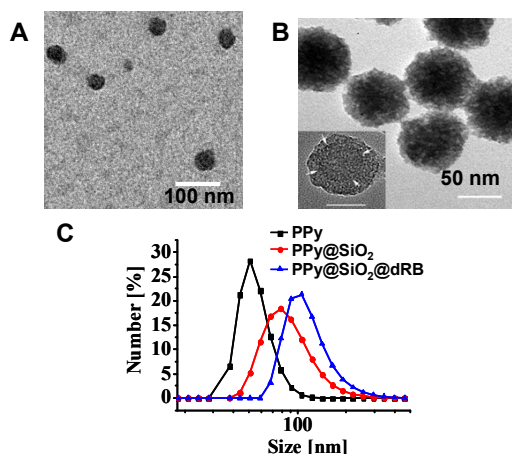

**Fig. S1** SEM images of PPY (A) and PPY@SiO<sub>2</sub>@dRB (B); Dynamic light scattering analysis of PPY, PPY @SiO<sub>2</sub>, and PPY@SiO<sub>2</sub>@dRB (C).

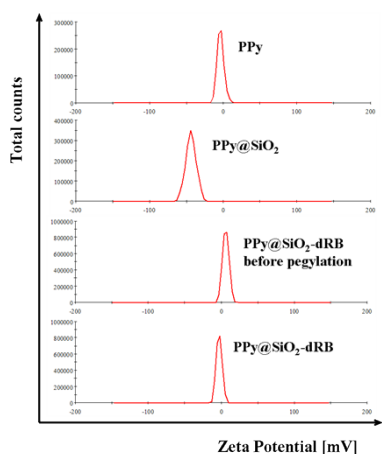

**Fig. S2** Zeta potentials of PPY, PPY@SiO<sub>2</sub> and PPY@SiO<sub>2</sub>@dRB before and after pegylation.

#### pH titration of PPY@SiO<sub>2</sub>@dRB

Aliquots of stock solution of PPY@SiO<sub>2</sub>@dRB (10  $\mu$ l, 5 mg ml<sup>-1</sup> in water) were respectively added to sodium phosphate buffers (100 mM, 1 ml) of various pH. The fluorescence emission@590 nm or UV-vis absorption of the solutions was recorded as a function of pH using  $\lambda_{ex}$ @560 nm. The titration curves were plotted by fluorescence emission intensities@590 nm over pH.

#### PPY@SiO<sub>2</sub>@dRB mediated conversion of NIR light into heat

Ultrapure water (2 ml) containing various amounts of PPY@SiO<sub>2</sub>@dRB (0, 0.1, 0.2, or 0.5 mg ml<sup>-1</sup>) were respectively illuminated with NIR light for 10 min (2 w cm<sup>-2</sup>). The temperature of the solutions was recorded as a function of illumination time.

#### Fluorescent reporting of lysosomes with PPY@SiO<sub>2</sub>@dRB

HeLa, HepG2 and 4T1 cells were seeded on 35 mm glass-bottom dishes (NEST) and incubated for 24 h in DMEM supplemented with 10% FBS. The cells were cultured for 2 h in DMEM spiked with PPY@SiO<sub>2</sub>@dRB (50  $\mu$ g ml<sup>-1</sup>) and DAPI (1  $\mu$ M). The cells were washed with PBS (1 ml) and further incubated with LysoTracker green (1  $\mu$ M) for 30 min in DMEM. The resultant cells were placed in fresh medium and then analyzed by confocal fluorescence microscopy.

For reversal staining of lysosomes, the three cell lines were pre-

incubated for 4 h at 37  $^{\circ}$ C in the absence or presence of BFA (50 nM), and then cultured for 2 h in DMEM containing PPY@SiO<sub>2</sub>@dRB (50  $\mu$ g ml<sup>-1</sup>) and DAPI (1  $\mu$ M). The cells were washed with PBS (1 ml), incubated with LysoTracker green (1  $\mu$ M) in DMEM for 30 min, and then analyzed by confocal fluorescence microscopy.

#### NIR mediated photothermal effects in PPY@SiO<sub>2</sub>@dRB treated cells

HepG2, HeLa cells and 4T1 were respectively cultured for 6 h in DMEM supplemented with or without PPY@SiO<sub>2</sub>@dRB (50  $\mu$ g ml<sup>-1</sup>) and SiO<sub>2</sub>@dRB (50  $\mu$ g ml<sup>-1</sup>), and then illuminated under NIR laser for 10 min (2 w cm<sup>-2</sup>). The cells were collected by centrifugation, washed with PBS and then analyzed by fluorescence microscopy and MTT assay. The fluorescence values were analyzed by the software of ImageJ.

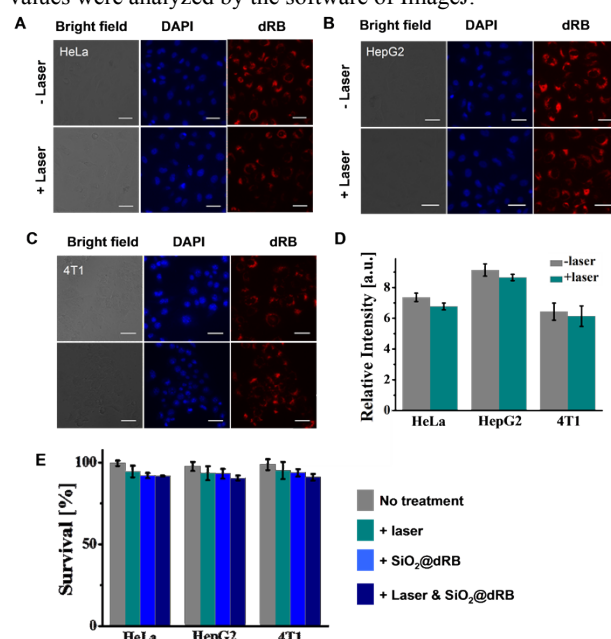

**Fig. S3** Effects of NIR irradiation on fluorescence of SiO<sub>2</sub>@dRB within cells. HeLa (A), HepG2 (B) and 4T1 cells (C) were respectively cultured for 6 h in DMEM supplemented with SiO<sub>2</sub>@dRB (50  $\mu$ g ml<sup>-1</sup>) and DAPI (1  $\mu$ M) and then illuminated with or without NIR light in DMEM for 10 min. The cells were probed by confocal fluorescence microscopy. (D) Intracellular fluorescence emission@575-590 nm was collected using  $\lambda_{ex}$ @510-560 nm; (E) cell viability was determined by MTT assay.

#### NIR triggered photothermal effects on subcutaneous tumors from mice treated with PPY@SiO<sub>2</sub>@dRB

Female Balb/c mice were obtained from Xiamen University Laboratory Animal Center. The 4T1 murine breast tumor models were generated by injection of the cells onto the flanks of each mouse. At 5-10 days after transplantation, the mice were injected intravenously via the tail vein with PPY@SiO<sub>2</sub>@dRB (30 mg kg<sup>-1</sup> in mice) or SiO<sub>2</sub>@dRB (30 mg kg<sup>-1</sup> in mice). After 12 h, the mice were anesthetized, and subcutaneous tumors was excised, washed with phosphate buffered saline (PBS) and then subjected to *ex vivo* analysis for the fluorescence intensity. The tumors were then illuminated with NIR light for 5 min (2 w cm<sup>-2</sup>) and then analyzed for fluorescence intensity.

#### Cytotoxicity of PPY@SiO<sub>2</sub>@dRB

HepG2 cells, 4T1 cells and HeLa cells were seeded in 96-well plates at a density of 1x10<sup>4</sup> cells/well and then incubated

overnight in DMEM containing 10% fetal bovine serum (FBS). The cells were washed with PBS and then incubated in fresh medium containing various amounts of PPy@SiO<sub>2</sub>@dRB (0, 0.05, 0.1, 0.2 mg ml<sup>-1</sup>) for 48 h. The cells were incubated in DMEM medium containing tetrazonium dye (0.25 mg ml<sup>-1</sup>) and then cultured for 4 h at 37°C. After removal of the supernatants, DMSO (100 μl) was added to each well to dissolve the formazan. The plate was shaken for 5 min and then analyzed by SpectraMax M5 to record the absorbance @490nm.

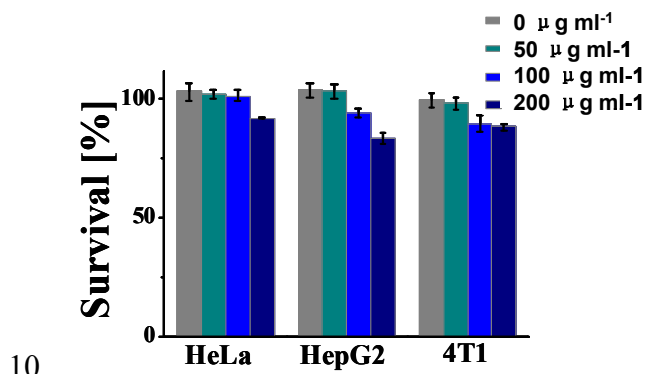

Fig. S4 Cytotoxicity of PPy@SiO<sub>2</sub>@dRB.

#### References

- 1 J. Y. Hong, H. Yoon, J. Jang, *Small* 2010, **6**, 679-686.
- 15 2 X. Wu, Z. Wu, Y. Yang, S. Han, *Chem. Comm.*, 2012, **48**, 1895.
